# Supplementary material for: Formation of the monoanion [Ar*P(BH3)(µ-BH2)2H]– with a symmetrically bridging hydride from the attempted synthesis of the dianion [Ar*P(BH3)3]2–
Source: Royal Society of Chemistry journal article supplement (doi:10.1039/b105030n), 2001-01-01
Supplement: b105030n.doc [file b105030n.doc]

**1**

Table 1. Crystal data and structure refinement for 1.

Identification code 1

Empirical formula C30 H60 B2 Li O3 P

Formula weight 528.31

Temperature 193(2) K

Wavelength 0.71073 Å

Crystal system Orthorhombic

Space group P2(1)2(1)2(1)

Unit cell dimensions a = 9.4853(5) Å = 90°.

b = 11.0044(5) Å = 90°.

c = 32.8968(16) Å  = 90°.

Volume 3433.8(3) Å3

Z 4

Density (calculated) 1.022 Mg/m3

Absorption coefficient 0.105 mm-1

F(000) 1168

Crystal size 0.5 x 0.7 x 0.8 mm3

Theta range for data collection 1.95 to 26.37°.

Index ranges -11<=h<=11, -12<=k<=13, -41<=l<=34

Reflections collected 18214

Independent reflections 7012 [R(int) = 0.0304]

Completeness to theta = 26.37° 99.9 %

Absorption correction Semi-empirical

Max. and min. transmission 1.000000 and 0.811550

Refinement method Full-matrix least-squares on F2

Data / restraints / parameters 7012 / 344 / 470

Goodness-of-fit on F2 1.078

Final R indices [I>2sigma(I)] R1 = 0.0505, wR2 = 0.1215

R indices (all data) R1 = 0.0671, wR2 = 0.1299

Absolute structure parameter 0.02(10)

Largest diff. peak and hole 0.345 and -0.223 e.Å-3

Table 2. Atomic coordinates ( x 104) and equivalent isotropic displacement parameters (Å2x 103)

for 1. U(eq) is defined as one third of the trace of the orthogonalized Uij tensor.

________________________________________________________________________________

x y z U(eq)

________________________________________________________________________________

B(1) 2383(4) 1977(2) 1083(1) 46(1)

B(2) 906(4) 4649(3) 749(1) 47(1)

P(1) 2291(1) 3752(1) 1087(1) 33(1)

C(1) 2802(2) 4425(2) 1584(1) 28(1)

C(2) 4112(2) 5072(2) 1622(1) 34(1)

C(3) 4540(2) 5454(2) 2005(1) 36(1)

C(4) 3786(2) 5240(2) 2357(1) 34(1)

C(5) 2517(2) 4652(2) 2314(1) 33(1)

C(6) 1972(2) 4258(2) 1939(1) 29(1)

C(7) 5137(3) 5386(3) 1266(1) 51(1)

C(8) 5886(3) 4225(3) 1112(1) 69(1)

C(9) 4384(3) 6120(3) 927(1) 60(1)

C(10) 6349(4) 6237(4) 1403(1) 90(1)

C(11) 500(2) 3636(2) 1982(1) 34(1)

C(12) -423(3) 4360(3) 2280(1) 49(1)

C(13) 731(3) 2347(2) 2149(1) 46(1)

C(14) -384(2) 3558(3) 1594(1) 45(1)

C(15) 4353(2) 5665(2) 2773(1) 41(1)

C(16) 4452(6) 7078(4) 2770(1) 60(1)

C(17) 3369(5) 5328(5) 3126(1) 60(1)

C(18) 5781(5) 5141(5) 2843(1) 57(1)

C(16') 4448(13) 4493(10) 3056(3) 72(3)

C(17') 5903(9) 6113(15) 2752(3) 70(4)

C(18') 3393(12) 6554(13) 2953(3) 80(4)

Li(1) 1086(5) 261(4) 807(1) 47(1)

O(1) 2265(3) -604(2) 432(1) 81(1)

C(19) 1700(17) -1802(10) 322(5) 49(3)

C(20) 2554(19) -2261(13) -25(6) 66(4)

C(21) 3307(18) -1151(11) -163(4) 82(4)

C(22) 3320(20) -294(16) 157(6) 103(7)

C(19') 1838(11) -1672(10) 221(4) 121(4)

C(20') 3003(13) -1960(10) -62(3) 120(4)

C(21') 4266(8) -1336(5) 106(2) 97(3)

C(22') 3703(7) -316(8) 327(3) 95(3)

O(2) 650(2) -935(2) 1219(1) 58(1)

C(23) 1636(3) -1168(3) 1535(1) 71(1)

C(24) 1351(4) -2389(3) 1696(1) 65(1)

C(25) -185(4) -2548(3) 1615(1) 69(1)

C(26) -460(4) -1818(3) 1248(1) 74(1)

O(3) -668(2) 576(2) 538(1) 66(1)

C(27) -815(9) 1414(12) 190(3) 75(3)

C(28) -2146(13) 2107(9) 225(4) 76(3)

C(29) -3023(9) 1339(10) 484(3) 78(2)

C(30) -2021(12) 723(15) 745(4) 83(4)

C(27') -560(12) 833(10) 109(2) 67(3)

C(28') -1294(17) 2009(8) 102(3) 75(3)

C(29') -2409(17) 1887(13) 422(4) 98(4)

C(30') -1866(14) 1095(15) 731(3) 76(4)

________________________________________________________________________________

Table 3. Bond lengths [Å] and angles [°] for 1.

_____________________________________________________

B(1)-P(1) 1.955(3)

B(1)-Li(1) 2.430(5)

B(1)-H(1A) 1.12(3)

B(1)-H(1B) 1.06(3)

B(1)-H(1C) 1.08(3)

B(2)-P(1) 1.984(3)

B(2)-H(2A) 1.18(4)

B(2)-H(2B) 1.02(4)

B(2)-H(2C) 1.02(3)

P(1)-C(1) 1.860(2)

P(1)-H(1) 1.252(19)

C(1)-C(6) 1.421(3)

C(1)-C(2) 1.437(3)

C(2)-C(3) 1.390(3)

C(2)-C(7) 1.561(3)

C(3)-C(4) 1.381(3)

C(3)-H(3) 0.9500

C(4)-C(5) 1.374(3)

C(4)-C(15) 1.543(3)

C(5)-C(6) 1.405(3)

C(5)-H(5) 0.9500

C(6)-C(11) 1.561(3)

C(7)-C(8) 1.548(4)

C(7)-C(10) 1.550(4)

C(7)-C(9) 1.551(4)

C(8)-H(8A) 0.9800

C(8)-H(8B) 0.9800

C(8)-H(8C) 0.9800

C(9)-H(9A) 0.9800

C(9)-H(9B) 0.9800

C(9)-H(9C) 0.9800

C(10)-H(10A) 0.9800

C(10)-H(10B) 0.9800

C(10)-H(10C) 0.9800

C(11)-C(14) 1.528(3)

C(11)-C(13) 1.537(3)

C(11)-C(12) 1.539(3)

C(12)-H(12A) 0.9800

C(12)-H(12B) 0.9800

C(12)-H(12C) 0.9800

C(13)-H(13A) 0.9800

C(13)-H(13B) 0.9800

C(13)-H(13C) 0.9800

C(14)-H(14A) 0.9800

C(14)-H(14B) 0.9800

C(14)-H(14C) 0.9800

C(15)-C(18') 1.462(10)

C(15)-C(18) 1.490(5)

C(15)-C(17) 1.537(5)

C(15)-C(17') 1.552(9)

C(15)-C(16) 1.558(5)

C(15)-C(16') 1.593(10)

C(16)-H(16A) 0.9800

C(16)-H(16B) 0.9800

C(16)-H(16C) 0.9800

C(17)-H(17A) 0.9800

C(17)-H(17B) 0.9800

C(17)-H(17C) 0.9800

C(18)-H(18A) 0.9800

C(18)-H(18B) 0.9800

C(18)-H(18C) 0.9800

C(16')-H(16D) 0.9800

C(16')-H(16E) 0.9800

C(16')-H(16F) 0.9800

C(17')-H(17D) 0.9800

C(17')-H(17E) 0.9800

C(17')-H(17F) 0.9800

C(18')-H(18D) 0.9800

C(18')-H(18E) 0.9800

C(18')-H(18F) 0.9800

Li(1)-O(3) 1.917(5)

Li(1)-O(1) 1.919(5)

Li(1)-O(2) 1.931(5)

Li(1)-H(1A) 2.06(3)

Li(1)-H(1B) 2.03(3)

O(1)-C(22) 1.392(12)

O(1)-C(19') 1.424(8)

O(1)-C(22') 1.443(7)

O(1)-C(19) 1.468(11)

C(19)-C(20) 1.488(12)

C(19)-H(19A) 0.9900

C(19)-H(19B) 0.9900

C(20)-C(21) 1.485(13)

C(20)-H(20A) 0.9900

C(20)-H(20B) 0.9900

C(21)-C(22) 1.412(13)

C(21)-H(21A) 0.9900

C(21)-H(21B) 0.9900

C(22)-H(22A) 0.9900

C(22)-H(22B) 0.9900

C(19')-C(20') 1.479(9)

C(19')-H(19C) 0.9900

C(19')-H(19D) 0.9900

C(20')-C(21') 1.488(10)

C(20')-H(20C) 0.9900

C(20')-H(20D) 0.9900

C(21')-C(22') 1.439(9)

C(21')-H(21C) 0.9900

C(21')-H(21D) 0.9900

C(22')-H(22C) 0.9900

C(22')-H(22D) 0.9900

O(2)-C(23) 1.423(3)

O(2)-C(26) 1.436(3)

C(23)-C(24) 1.468(4)

C(23)-H(23A) 0.9900

C(23)-H(23B) 0.9900

C(24)-C(25) 1.491(4)

C(24)-H(24A) 0.9900

C(24)-H(24B) 0.9900

C(25)-C(26) 1.474(4)

C(25)-H(25A) 0.9900

C(25)-H(25B) 0.9900

C(26)-H(26A) 0.9900

C(26)-H(26B) 0.9900

O(3)-C(30') 1.421(10)

O(3)-C(27') 1.442(8)

O(3)-C(30) 1.461(9)

O(3)-C(27) 1.477(8)

C(27)-C(28) 1.479(11)

C(27)-H(27A) 0.9900

C(27)-H(27B) 0.9900

C(28)-C(29) 1.460(10)

C(28)-H(28A) 0.9900

C(28)-H(28B) 0.9900

C(29)-C(30) 1.448(11)

C(29)-H(29A) 0.9900

C(29)-H(29B) 0.9900

C(30)-H(30A) 0.9900

C(30)-H(30B) 0.9900

C(27')-C(28') 1.469(10)

C(27')-H(27C) 0.9900

C(27')-H(27D) 0.9900

C(28')-C(29') 1.498(11)

C(28')-H(28C) 0.9900

C(28')-H(28D) 0.9900

C(29')-C(30') 1.434(11)

C(29')-H(29C) 0.9900

C(29')-H(29D) 0.9900

C(30')-H(30C) 0.9900

C(30')-H(30D) 0.9900

P(1)-B(1)-Li(1) 139.2(2)

P(1)-B(1)-H(1A) 100.9(14)

Li(1)-B(1)-H(1A) 57.8(14)

P(1)-B(1)-H(1B) 113.3(15)

Li(1)-B(1)-H(1B) 55.8(15)

H(1A)-B(1)-H(1B) 109(2)

P(1)-B(1)-H(1C) 105.2(17)

Li(1)-B(1)-H(1C) 115.0(17)

H(1A)-B(1)-H(1C) 112(2)

H(1B)-B(1)-H(1C) 115(2)

P(1)-B(2)-H(2A) 103.8(18)

P(1)-B(2)-H(2B) 105(2)

H(2A)-B(2)-H(2B) 109(3)

P(1)-B(2)-H(2C) 106.7(17)

H(2A)-B(2)-H(2C) 116(2)

H(2B)-B(2)-H(2C) 115(3)

C(1)-P(1)-B(1) 113.05(11)

C(1)-P(1)-B(2) 117.88(12)

B(1)-P(1)-B(2) 121.52(14)

C(1)-P(1)-H(1) 97.9(9)

B(1)-P(1)-H(1) 100.1(9)

B(2)-P(1)-H(1) 99.6(9)

C(6)-C(1)-C(2) 118.18(18)

C(6)-C(1)-P(1) 121.85(15)

C(2)-C(1)-P(1) 119.86(16)

C(3)-C(2)-C(1) 118.7(2)

C(3)-C(2)-C(7) 115.5(2)

C(1)-C(2)-C(7) 125.73(19)

C(4)-C(3)-C(2) 123.8(2)

C(4)-C(3)-H(3) 118.1

C(2)-C(3)-H(3) 118.1

C(5)-C(4)-C(3) 116.7(2)

C(5)-C(4)-C(15) 122.6(2)

C(3)-C(4)-C(15) 120.7(2)

C(4)-C(5)-C(6) 123.8(2)

C(4)-C(5)-H(5) 118.1

C(6)-C(5)-H(5) 118.1

C(5)-C(6)-C(1) 118.56(19)

C(5)-C(6)-C(11) 112.72(18)

C(1)-C(6)-C(11) 128.69(18)

C(8)-C(7)-C(10) 104.7(3)

C(8)-C(7)-C(9) 114.0(2)

C(10)-C(7)-C(9) 103.6(3)

C(8)-C(7)-C(2) 110.4(2)

C(10)-C(7)-C(2) 112.2(2)

C(9)-C(7)-C(2) 111.6(2)

C(7)-C(8)-H(8A) 109.5

C(7)-C(8)-H(8B) 109.5

H(8A)-C(8)-H(8B) 109.5

C(7)-C(8)-H(8C) 109.5

H(8A)-C(8)-H(8C) 109.5

H(8B)-C(8)-H(8C) 109.5

C(7)-C(9)-H(9A) 109.5

C(7)-C(9)-H(9B) 109.5

H(9A)-C(9)-H(9B) 109.5

C(7)-C(9)-H(9C) 109.5

H(9A)-C(9)-H(9C) 109.5

H(9B)-C(9)-H(9C) 109.5

C(7)-C(10)-H(10A) 109.5

C(7)-C(10)-H(10B) 109.5

H(10A)-C(10)-H(10B) 109.5

C(7)-C(10)-H(10C) 109.5

H(10A)-C(10)-H(10C) 109.5

H(10B)-C(10)-H(10C) 109.5

C(14)-C(11)-C(13) 109.0(2)

C(14)-C(11)-C(12) 104.46(19)

C(13)-C(11)-C(12) 109.3(2)

C(14)-C(11)-C(6) 116.18(18)

C(13)-C(11)-C(6) 107.99(18)

C(12)-C(11)-C(6) 109.79(18)

C(11)-C(12)-H(12A) 109.5

C(11)-C(12)-H(12B) 109.5

H(12A)-C(12)-H(12B) 109.5

C(11)-C(12)-H(12C) 109.5

H(12A)-C(12)-H(12C) 109.5

H(12B)-C(12)-H(12C) 109.5

C(11)-C(13)-H(13A) 109.5

C(11)-C(13)-H(13B) 109.5

H(13A)-C(13)-H(13B) 109.5

C(11)-C(13)-H(13C) 109.5

H(13A)-C(13)-H(13C) 109.5

H(13B)-C(13)-H(13C) 109.5

C(11)-C(14)-H(14A) 109.5

C(11)-C(14)-H(14B) 109.5

H(14A)-C(14)-H(14B) 109.5

C(11)-C(14)-H(14C) 109.5

H(14A)-C(14)-H(14C) 109.5

H(14B)-C(14)-H(14C) 109.5

C(18')-C(15)-C(18) 139.6(5)

C(18')-C(15)-C(17) 58.5(6)

C(18)-C(15)-C(17) 109.9(3)

C(18')-C(15)-C(4) 110.1(4)

C(18)-C(15)-C(4) 109.8(2)

C(17)-C(15)-C(4) 112.8(2)

C(18')-C(15)-C(17') 113.3(8)

C(18)-C(15)-C(17') 43.0(6)

C(17)-C(15)-C(17') 133.2(4)

C(4)-C(15)-C(17') 112.8(4)

C(18')-C(15)-C(16) 51.1(6)

C(18)-C(15)-C(16) 109.4(3)

C(17)-C(15)-C(16) 106.4(3)

C(4)-C(15)-C(16) 108.6(2)

C(17')-C(15)-C(16) 68.0(6)

C(18')-C(15)-C(16') 109.9(7)

C(18)-C(15)-C(16') 62.9(5)

C(17)-C(15)-C(16') 52.8(5)

C(4)-C(15)-C(16') 107.1(4)

C(17')-C(15)-C(16') 103.2(7)

C(16)-C(15)-C(16') 143.8(4)

C(15)-C(16)-H(16A) 109.5

C(15)-C(16)-H(16B) 109.5

H(16A)-C(16)-H(16B) 109.5

C(15)-C(16)-H(16C) 109.5

H(16A)-C(16)-H(16C) 109.5

H(16B)-C(16)-H(16C) 109.5

C(15)-C(17)-H(17A) 109.5

C(15)-C(17)-H(17B) 109.5

H(17A)-C(17)-H(17B) 109.5

C(15)-C(17)-H(17C) 109.5

H(17A)-C(17)-H(17C) 109.5

H(17B)-C(17)-H(17C) 109.5

C(15)-C(18)-H(18A) 109.5

C(15)-C(18)-H(18B) 109.5

H(18A)-C(18)-H(18B) 109.5

C(15)-C(18)-H(18C) 109.5

H(18A)-C(18)-H(18C) 109.5

H(18B)-C(18)-H(18C) 109.5

C(15)-C(16')-H(16D) 109.5

C(15)-C(16')-H(16E) 109.5

H(16D)-C(16')-H(16E) 109.5

C(15)-C(16')-H(16F) 109.5

H(16D)-C(16')-H(16F) 109.5

H(16E)-C(16')-H(16F) 109.5

C(15)-C(17')-H(17D) 109.5

C(15)-C(17')-H(17E) 109.5

H(17D)-C(17')-H(17E) 109.5

C(15)-C(17')-H(17F) 109.5

H(17D)-C(17')-H(17F) 109.5

H(17E)-C(17')-H(17F) 109.5

C(15)-C(18')-H(18D) 109.5

C(15)-C(18')-H(18E) 109.5

H(18D)-C(18')-H(18E) 109.5

C(15)-C(18')-H(18F) 109.5

H(18D)-C(18')-H(18F) 109.5

H(18E)-C(18')-H(18F) 109.5

O(3)-Li(1)-O(1) 107.3(2)

O(3)-Li(1)-O(2) 105.1(2)

O(1)-Li(1)-O(2) 103.7(2)

O(3)-Li(1)-B(1) 118.1(2)

O(1)-Li(1)-B(1) 109.3(2)

O(2)-Li(1)-B(1) 112.1(2)

O(3)-Li(1)-H(1A) 107.7(8)

O(1)-Li(1)-H(1A) 90.6(8)

O(2)-Li(1)-H(1A) 138.1(8)

B(1)-Li(1)-H(1A) 27.4(7)

O(3)-Li(1)-H(1B) 111.2(8)

O(1)-Li(1)-H(1B) 132.3(8)

O(2)-Li(1)-H(1B) 92.4(9)

B(1)-Li(1)-H(1B) 25.6(8)

H(1A)-Li(1)-H(1B) 51.6(11)

C(22)-O(1)-C(19') 95.1(7)

C(22)-O(1)-C(22') 27.2(11)

C(19')-O(1)-C(22') 109.5(5)

C(22)-O(1)-C(19) 108.8(8)

C(19')-O(1)-C(19) 15.2(9)

C(22')-O(1)-C(19) 118.9(7)

C(22)-O(1)-Li(1) 135.7(7)

C(19')-O(1)-Li(1) 123.9(5)

C(22')-O(1)-Li(1) 126.6(4)

C(19)-O(1)-Li(1) 113.1(6)

O(1)-C(19)-C(20) 107.2(9)

O(1)-C(19)-H(19A) 110.3

C(20)-C(19)-H(19A) 110.3

O(1)-C(19)-H(19B) 110.3

C(20)-C(19)-H(19B) 110.3

H(19A)-C(19)-H(19B) 108.5

C(21)-C(20)-C(19) 102.5(10)

C(21)-C(20)-H(20A) 111.3

C(19)-C(20)-H(20A) 111.3

C(21)-C(20)-H(20B) 111.3

C(19)-C(20)-H(20B) 111.3

H(20A)-C(20)-H(20B) 109.2

C(22)-C(21)-C(20) 109.1(10)

C(22)-C(21)-H(21A) 109.9

C(20)-C(21)-H(21A) 109.9

C(22)-C(21)-H(21B) 109.9

C(20)-C(21)-H(21B) 109.9

H(21A)-C(21)-H(21B) 108.3

O(1)-C(22)-C(21) 108.3(9)

O(1)-C(22)-H(22A) 110.0

C(21)-C(22)-H(22A) 110.0

O(1)-C(22)-H(22B) 110.0

C(21)-C(22)-H(22B) 110.0

H(22A)-C(22)-H(22B) 108.4

O(1)-C(19')-C(20') 105.7(7)

O(1)-C(19')-H(19C) 110.6

C(20')-C(19')-H(19C) 110.6

O(1)-C(19')-H(19D) 110.6

C(20')-C(19')-H(19D) 110.6

H(19C)-C(19')-H(19D) 108.7

C(19')-C(20')-C(21') 105.6(6)

C(19')-C(20')-H(20C) 110.6

C(21')-C(20')-H(20C) 110.6

C(19')-C(20')-H(20D) 110.6

C(21')-C(20')-H(20D) 110.6

H(20C)-C(20')-H(20D) 108.8

C(22')-C(21')-C(20') 104.4(6)

C(22')-C(21')-H(21C) 110.9

C(20')-C(21')-H(21C) 110.9

C(22')-C(21')-H(21D) 110.9

C(20')-C(21')-H(21D) 110.9

H(21C)-C(21')-H(21D) 108.9

C(21')-C(22')-O(1) 107.5(6)

C(21')-C(22')-H(22C) 110.2

O(1)-C(22')-H(22C) 110.2

C(21')-C(22')-H(22D) 110.2

O(1)-C(22')-H(22D) 110.2

H(22C)-C(22')-H(22D) 108.5

C(23)-O(2)-C(26) 108.1(2)

C(23)-O(2)-Li(1) 119.7(2)

C(26)-O(2)-Li(1) 131.7(2)

O(2)-C(23)-C(24) 107.9(2)

O(2)-C(23)-H(23A) 110.1

C(24)-C(23)-H(23A) 110.1

O(2)-C(23)-H(23B) 110.1

C(24)-C(23)-H(23B) 110.1

H(23A)-C(23)-H(23B) 108.4

C(23)-C(24)-C(25) 102.9(3)

C(23)-C(24)-H(24A) 111.2

C(25)-C(24)-H(24A) 111.2

C(23)-C(24)-H(24B) 111.2

C(25)-C(24)-H(24B) 111.2

H(24A)-C(24)-H(24B) 109.1

C(26)-C(25)-C(24) 104.7(3)

C(26)-C(25)-H(25A) 110.8

C(24)-C(25)-H(25A) 110.8

C(26)-C(25)-H(25B) 110.8

C(24)-C(25)-H(25B) 110.8

H(25A)-C(25)-H(25B) 108.9

O(2)-C(26)-C(25) 107.2(3)

O(2)-C(26)-H(26A) 110.3

C(25)-C(26)-H(26A) 110.3

O(2)-C(26)-H(26B) 110.3

C(25)-C(26)-H(26B) 110.3

H(26A)-C(26)-H(26B) 108.5

C(30')-O(3)-C(27') 114.4(6)

C(30')-O(3)-C(30) 17.4(12)

C(27')-O(3)-C(30) 119.7(7)

C(30')-O(3)-C(27) 91.1(6)

C(27')-O(3)-C(27) 29.0(4)

C(30)-O(3)-C(27) 102.0(5)

C(30')-O(3)-Li(1) 124.1(6)

C(27')-O(3)-Li(1) 115.2(5)

C(30)-O(3)-Li(1) 124.6(6)

C(27)-O(3)-Li(1) 123.6(4)

O(3)-C(27)-C(28) 110.0(6)

O(3)-C(27)-H(27A) 109.7

C(28)-C(27)-H(27A) 109.7

O(3)-C(27)-H(27B) 109.7

C(28)-C(27)-H(27B) 109.7

H(27A)-C(27)-H(27B) 108.2

C(29)-C(28)-C(27) 103.5(7)

C(29)-C(28)-H(28A) 111.1

C(27)-C(28)-H(28A) 111.1

C(29)-C(28)-H(28B) 111.1

C(27)-C(28)-H(28B) 111.1

H(28A)-C(28)-H(28B) 109.0

C(30)-C(29)-C(28) 104.0(7)

C(30)-C(29)-H(29A) 111.0

C(28)-C(29)-H(29A) 111.0

C(30)-C(29)-H(29B) 111.0

C(28)-C(29)-H(29B) 111.0

H(29A)-C(29)-H(29B) 109.0

C(29)-C(30)-O(3) 110.7(8)

C(29)-C(30)-H(30A) 109.5

O(3)-C(30)-H(30A) 109.5

C(29)-C(30)-H(30B) 109.5

O(3)-C(30)-H(30B) 109.5

H(30A)-C(30)-H(30B) 108.1

O(3)-C(27')-C(28') 99.0(6)

O(3)-C(27')-H(27C) 112.0

C(28')-C(27')-H(27C) 112.0

O(3)-C(27')-H(27D) 112.0

C(28')-C(27')-H(27D) 112.0

H(27C)-C(27')-H(27D) 109.7

C(27')-C(28')-C(29') 104.1(8)

C(27')-C(28')-H(28C) 110.9

C(29')-C(28')-H(28C) 110.9

C(27')-C(28')-H(28D) 110.9

C(29')-C(28')-H(28D) 110.9

H(28C)-C(28')-H(28D) 109.0

C(30')-C(29')-C(28') 107.4(8)

C(30')-C(29')-H(29C) 110.2

C(28')-C(29')-H(29C) 110.2

C(30')-C(29')-H(29D) 110.2

C(28')-C(29')-H(29D) 110.2

H(29C)-C(29')-H(29D) 108.5

O(3)-C(30')-C(29') 102.5(7)

O(3)-C(30')-H(30C) 111.3

C(29')-C(30')-H(30C) 111.3

O(3)-C(30')-H(30D) 111.3

C(29')-C(30')-H(30D) 111.3

H(30C)-C(30')-H(30D) 109.2

_____________________________________________________________

Symmetry transformations used to generate equivalent atoms:

Table 4. Anisotropic displacement parameters (Å2x 103) for 1. The anisotropic

displacement factor exponent takes the form: -22[ h2 a*2U11 + ... + 2 h k a* b* U12 ]

______________________________________________________________________________

U11 U22 U33 U23 U13 U12

______________________________________________________________________________

B(1) 63(2) 33(1) 42(1) -5(1) -2(2) -1(1)

B(2) 53(2) 54(2) 35(1) 9(1) -12(1) 2(2)

P(1) 42(1) 31(1) 27(1) 0(1) -5(1) -2(1)

C(1) 32(1) 25(1) 27(1) 1(1) -7(1) 1(1)

C(2) 35(1) 35(1) 32(1) 4(1) -1(1) -3(1)

C(3) 31(1) 37(1) 38(1) 1(1) -4(1) -7(1)

C(4) 37(1) 33(1) 32(1) -1(1) -7(1) 3(1)

C(5) 36(1) 35(1) 27(1) 3(1) 1(1) 2(1)

C(6) 32(1) 26(1) 29(1) 3(1) -6(1) 1(1)

C(7) 45(1) 71(2) 35(1) 4(1) 4(1) -20(1)

C(8) 47(2) 108(3) 52(2) -2(2) 9(1) 12(2)

C(9) 84(2) 52(2) 43(1) 12(1) 12(1) -19(2)

C(10) 72(2) 140(4) 59(2) 2(2) 12(2) -64(2)

C(11) 33(1) 32(1) 36(1) 1(1) 1(1) -4(1)

C(12) 39(1) 49(2) 58(2) -7(1) 8(1) -7(1)

C(13) 56(2) 34(1) 48(1) 7(1) 0(1) -10(1)

C(14) 34(1) 55(2) 47(1) -1(1) -3(1) -9(1)

C(15) 41(1) 48(1) 35(1) -8(1) -8(1) 1(1)

C(16) 81(3) 47(2) 53(2) -18(2) -17(2) 7(2)

C(17) 70(3) 89(4) 23(2) -7(2) -7(2) -9(2)

C(18) 55(2) 67(3) 49(2) -14(2) -22(2) 10(2)

C(16') 83(8) 97(7) 36(5) 7(5) -25(5) 0(6)

C(17') 47(5) 126(12) 36(5) -24(6) -15(4) -18(6)

C(18') 72(7) 113(10) 54(7) -42(7) -19(6) 21(7)

Li(1) 49(2) 45(2) 45(2) -3(2) -3(2) -5(2)

O(1) 74(1) 77(1) 94(2) -40(1) 25(1) -8(1)

C(19) 72(7) 27(5) 49(6) -4(5) 7(5) 6(4)

C(20) 83(9) 55(6) 60(7) 9(5) 35(6) 0(6)

C(21) 108(10) 62(7) 76(7) 25(6) 46(7) 4(7)

C(22) 123(14) 67(8) 119(13) 4(7) 55(11) -30(9)

C(19') 111(6) 126(8) 126(8) -84(7) 4(5) -1(5)

C(20') 171(9) 114(9) 74(5) -26(6) 40(6) 34(7)

C(21') 126(5) 57(3) 106(5) 26(3) 72(4) 21(3)

C(22') 68(4) 101(5) 115(6) -5(5) 37(4) 20(3)

O(2) 63(1) 47(1) 62(1) 18(1) -22(1) -18(1)

C(23) 66(2) 74(2) 74(2) 21(2) -22(2) -16(2)

C(24) 81(2) 52(2) 61(2) 13(2) -4(2) 13(2)

C(25) 80(2) 60(2) 66(2) 16(2) -8(2) -19(2)

C(26) 65(2) 68(2) 90(2) 22(2) -12(2) -20(2)

O(3) 57(1) 91(2) 52(1) 23(1) -8(1) -1(1)

C(27) 73(5) 81(8) 70(6) 31(5) -11(4) -3(5)

C(28) 82(7) 68(5) 79(7) 12(5) -18(6) 9(5)

C(29) 67(4) 72(5) 96(6) -2(5) -4(4) 14(4)

C(30) 61(5) 84(8) 104(7) 32(6) 12(4) 17(5)

C(27') 94(6) 61(6) 46(4) 10(4) -18(3) 7(4)

C(28') 116(10) 53(5) 56(5) 4(4) -16(5) 9(5)

C(29') 97(9) 72(8) 124(9) 15(7) 3(7) 32(6)

C(30') 79(6) 86(9) 63(5) 10(5) -11(4) 3(5)

______________________________________________________________________________

Table 5. Hydrogen coordinates ( x 104) and isotropic displacement parameters (Å2x 10 3)

for 1.

________________________________________________________________________________

x y z U(eq)

________________________________________________________________________________

H(1A) 2330(30) 1790(20) 748(8) 49(7)

H(1B) 1510(30) 1560(30) 1230(9) 56(8)

H(1C) 3400(30) 1760(30) 1210(10) 70(9)

H(2A) 810(40) 5600(40) 911(11) 97(12)

H(2B) 1390(40) 4760(40) 475(13) 108(14)

H(2C) 10(30) 4140(30) 744(9) 64(9)

H(1) 3400(20) 3997(18) 896(6) 19(5)

H(3) 5403 5888 2026 43

H(5) 1976 4502 2552 39

H(8A) 6347 4395 851 103

H(8B) 5191 3575 1075 103

H(8C) 6595 3969 1311 103

H(9A) 4180 6942 1026 89

H(9B) 3500 5715 854 89

H(9C) 4995 6168 687 89

H(10A) 5951 6971 1527 135

H(10B) 6920 6464 1166 135

H(10C) 6942 5815 1601 135

H(12A) -1390 4047 2272 73

H(12B) -423 5220 2202 73

H(12C) -45 4276 2556 73

H(13A) -184 1956 2194 69

H(13B) 1246 2394 2407 69

H(13C) 1277 1870 1953 69

H(14A) 78 3011 1400 68

H(14B) -473 4368 1473 68

H(14C) -1323 3243 1660 68

H(16A) 3517 7423 2719 90

H(16B) 5103 7338 2555 90

H(16C) 4800 7362 3034 90

H(17A) 3754 5651 3381 90

H(17B) 3294 4441 3146 90

H(17C) 2433 5676 3078 90

H(18A) 6414 5390 2623 86

H(18B) 5717 4252 2850 86

H(18C) 6151 5436 3103 86

H(16D) 4949 4700 3307 107

H(16E) 4958 3848 2913 107

H(16F) 3495 4212 3122 107

H(17D) 5947 6872 2597 105

H(17E) 6486 5496 2619 105

H(17F) 6255 6254 3028 105

H(18D) 3753 6805 3219 120

H(18E) 2458 6189 2985 120

H(18F) 3325 7265 2774 120

H(19A) 697 -1732 242 59

H(19B) 1771 -2365 556 59

H(20A) 3224 -2897 64 79

H(20B) 1944 -2592 -243 79

H(21A) 4285 -1359 -241 99

H(21B) 2826 -803 -403 99

H(22A) 4249 -298 294 124

H(22B) 3148 532 48 124

H(19C) 953 -1524 69 145

H(19D) 1683 -2350 413 145

H(20C) 2789 -1657 -339 144

H(20D) 3159 -2848 -76 144

H(21C) 4797 -1883 290 116

H(21D) 4900 -1062 -114 116

H(22C) 3734 425 156 113

H(22D) 4264 -167 576 113

H(23A) 1534 -555 1753 85

H(23B) 2610 -1125 1428 85

H(24A) 1558 -2433 1990 77

H(24B) 1915 -3011 1552 77

H(25A) -413 -3414 1567 82

H(25B) -752 -2251 1847 82

H(26A) -468 -2344 1004 89

H(26B) -1385 -1407 1270 89

H(27A) -814 945 -67 90

H(27B) -7 1982 184 90

H(28A) -1982 2910 352 92

H(28B) -2588 2227 -45 92

H(29A) -3687 1836 646 94

H(29B) -3567 749 320 94

H(30A) -2397 -85 821 99

H(30B) -1885 1200 997 99

H(27C) -1049 215 -58 80

H(27D) 433 906 20 80

H(28C) -1721 2161 -168 90

H(28D) -639 2681 167 90

H(29C) -2633 2693 539 117

H(29D) -3280 1542 303 117

H(30C) -1594 1554 977 91

H(30D) -2563 464 805 91

________________________________________________________________________________

**2**

Table 1. Crystal data and structure refinement for 2.

Identification code 2

Empirical formula C33 H61 B3 Li O2 P

Formula weight 560.16

Temperature 193(2) K

Wavelength 0.71073 Å

Crystal system Triclinic

Space group P-1

Unit cell dimensions a = 9.8395(8) Å = 96.708(2)°.

b = 11.2345(9) Å = 98.842(2)°.

c = 16.5435(13) Å  = 91.449(2)°.

Volume 1792.9(2) Å3

Z 2

Density (calculated) 1.038 Mg/m3

Absorption coefficient 0.102 mm-1

F(000) 616

Crystal size 0.05 x 0.2 x 0.5 mm3

Theta range for data collection 1.26 to 26.37°.

Index ranges -12<=h<=9, -11<=k<=14, -20<=l<=19

Reflections collected 10510

Independent reflections 7210 [R(int) = 0.0175]

Completeness to theta = 26.37° 98.4 %

Absorption correction Semi-empirical

Max. and min. transmission 1.000000 and 0.494284

Refinement method Full-matrix least-squares on F2

Data / restraints / parameters 7210 / 52 / 434

Goodness-of-fit on F2 1.036

Final R indices [I>2sigma(I)] R1 = 0.0499, wR2 = 0.1286

R indices (all data) R1 = 0.0611, wR2 = 0.1379

Largest diff. peak and hole 0.484 and -0.391 e.Å-3

Table 2. Atomic coordinates ( x 104) and equivalent isotropic displacement parameters (Å2x 103)

for 2. U(eq) is defined as one third of the trace of the orthogonalized Uij tensor.

________________________________________________________________________________

x y z U(eq)

________________________________________________________________________________

B(1) 5399(2) 4178(2) 4041(1) 29(1)

B(2) 3937(2) 1598(2) 3048(1) 37(1)

B(3) 5818(2) 1303(2) 3625(1) 37(1)

P(1) 5420(1) 2792(1) 3204(1) 24(1)

C(1) 6129(2) 2867(1) 2241(1) 22(1)

C(2) 7506(2) 2542(1) 2188(1) 25(1)

C(3) 7821(2) 2115(2) 1413(1) 29(1)

C(5) 5621(2) 2535(1) 749(1) 28(1)

C(6) 5221(2) 2979(1) 1501(1) 24(1)

C(7) 8773(2) 2679(2) 2891(1) 31(1)

C(8) 8527(2) 3327(2) 3720(1) 42(1)

C(9) 9362(2) 1454(2) 3027(1) 47(1)

C(10) 9894(2) 3461(2) 2620(1) 46(1)

C(4) 6885(2) 2041(1) 690(1) 28(1)

C(11) 7253(2) 1500(2) -141(1) 36(1)

C(12) 8579(5) 820(5) -61(3) 46(1)

C(13) 7235(6) 2399(4) -720(2) 53(1)

C(14) 6068(5) 481(4) -521(3) 52(1)

C(12') 7783(7) 301(4) -82(3) 54(1)

C(13') 8471(4) 2356(4) -337(2) 46(1)

C(14') 6109(4) 1535(5) -864(2) 51(1)

C(15) 3829(2) 3615(2) 1404(1) 31(1)

C(16) 3923(2) 4547(2) 796(1) 44(1)

C(17) 3475(2) 4330(2) 2189(1) 42(1)

C(18) 2622(2) 2718(2) 1047(1) 43(1)

Li(1) 4923(3) 6351(3) 4542(2) 34(1)

O(1) 6518(1) 7411(1) 4600(1) 35(1)

C(19) 7902(2) 7007(2) 4750(2) 57(1)

C(20) 8800(2) 8034(2) 4582(2) 57(1)

C(21) 8060(2) 9111(2) 4891(2) 52(1)

C(22) 6574(2) 8702(2) 4637(1) 37(1)

O(2) 3376(1) 6983(1) 3872(1) 39(1)

C(23) 3269(3) 8088(3) 3516(2) 69(1)

C(24) 1757(2) 8186(2) 3180(2) 63(1)

C(25) 1215(2) 6916(2) 3045(2) 62(1)

C(26) 2040(2) 6383(2) 3743(1) 51(1)

C(27) 8230(2) 6430(2) 1407(1) 49(1)

C(28) 8334(3) 7645(2) 1330(1) 59(1)

C(29) 7616(3) 8474(2) 1760(2) 66(1)

C(30) 6779(3) 8109(2) 2280(2) 71(1)

C(31) 6670(3) 6917(2) 2375(2) 69(1)

C(32) 7373(3) 6084(2) 1941(2) 57(1)

C(33) 9005(3) 5528(3) 943(2) 71(1)

________________________________________________________________________________

Table 3. Bond lengths [Å] and angles [°] for 2.

_____________________________________________________

B(1)-P(1) 1.9615(17)

B(1)-Li(1)#1 2.548(3)

B(1)-Li(1) 2.563(3)

B(2)-P(1) 1.924(2)

B(2)-B(3) 2.002(3)

B(3)-P(1) 1.913(2)

P(1)-C(1) 1.8452(15)

C(1)-C(6) 1.421(2)

C(1)-C(2) 1.425(2)

C(2)-C(3) 1.399(2)

C(2)-C(7) 1.560(2)

C(3)-C(4) 1.385(2)

C(5)-C(4) 1.387(2)

C(5)-C(6) 1.402(2)

C(6)-C(15) 1.555(2)

C(7)-C(8) 1.532(2)

C(7)-C(9) 1.534(3)

C(7)-C(10) 1.544(3)

C(4)-C(11) 1.536(2)

C(11)-C(12') 1.466(5)

C(11)-C(13) 1.469(4)

C(11)-C(14') 1.516(4)

C(11)-C(12) 1.525(4)

C(11)-C(13') 1.613(4)

C(11)-C(14) 1.614(4)

C(15)-C(18) 1.536(3)

C(15)-C(17) 1.537(2)

C(15)-C(16) 1.545(3)

Li(1)-O(1) 1.930(3)

Li(1)-O(2) 1.942(3)

Li(1)-B(1)#1 2.548(3)

O(1)-C(19) 1.440(2)

O(1)-C(22) 1.443(2)

C(19)-C(20) 1.513(3)

C(20)-C(21) 1.507(3)

C(21)-C(22) 1.503(3)

O(2)-C(23) 1.434(3)

O(2)-C(26) 1.437(2)

C(23)-C(24) 1.518(3)

C(24)-C(25) 1.491(4)

C(25)-C(26) 1.500(3)

C(27)-C(28) 1.389(3)

C(27)-C(32) 1.390(3)

C(27)-C(33) 1.495(3)

C(28)-C(29) 1.381(4)

C(29)-C(30) 1.367(4)

C(30)-C(31) 1.370(4)

C(31)-C(32) 1.378(4)

P(1)-B(1)-Li(1)#1 114.66(11)

P(1)-B(1)-Li(1) 154.39(11)

Li(1)#1-B(1)-Li(1) 87.78(11)

P(1)-B(2)-B(3) 58.29(8)

P(1)-B(3)-B(2) 58.81(9)

C(1)-P(1)-B(3) 110.68(8)

C(1)-P(1)-B(2) 110.94(8)

B(3)-P(1)-B(2) 62.91(10)

C(1)-P(1)-B(1) 123.45(7)

B(3)-P(1)-B(1) 115.26(9)

B(2)-P(1)-B(1) 118.27(9)

C(6)-C(1)-C(2) 118.67(13)

C(6)-C(1)-P(1) 119.37(11)

C(2)-C(1)-P(1) 120.41(11)

C(3)-C(2)-C(1) 118.04(13)

C(3)-C(2)-C(7) 113.95(13)

C(1)-C(2)-C(7) 127.88(13)

C(4)-C(3)-C(2) 123.64(14)

C(4)-C(5)-C(6) 123.25(14)

C(5)-C(6)-C(1) 118.32(13)

C(5)-C(6)-C(15) 113.78(13)

C(1)-C(6)-C(15) 127.80(13)

C(8)-C(7)-C(9) 108.97(15)

C(8)-C(7)-C(10) 104.93(15)

C(9)-C(7)-C(10) 108.19(15)

C(8)-C(7)-C(2) 115.76(13)

C(9)-C(7)-C(2) 110.82(14)

C(10)-C(7)-C(2) 107.77(14)

C(3)-C(4)-C(5) 116.49(14)

C(3)-C(4)-C(11) 121.83(14)

C(5)-C(4)-C(11) 121.61(14)

C(12')-C(11)-C(13) 136.5(3)

C(12')-C(11)-C(14') 113.1(3)

C(13)-C(11)-C(14') 57.1(3)

C(12')-C(11)-C(12) 37.3(2)

C(13)-C(11)-C(12) 112.7(3)

C(14')-C(11)-C(12) 131.3(2)

C(12')-C(11)-C(4) 110.5(2)

C(13)-C(11)-C(4) 111.62(19)

C(14')-C(11)-C(4) 113.98(19)

C(12)-C(11)-C(4) 113.5(2)

C(12')-C(11)-C(13') 108.0(3)

C(13)-C(11)-C(13') 49.1(3)

C(14')-C(11)-C(13') 104.2(3)

C(12)-C(11)-C(13') 71.7(3)

C(4)-C(11)-C(13') 106.57(18)

C(12')-C(11)-C(14) 69.4(3)

C(13)-C(11)-C(14) 108.0(3)

C(14')-C(11)-C(14) 52.0(3)

C(12)-C(11)-C(14) 104.2(3)

C(4)-C(11)-C(14) 106.18(19)

C(13')-C(11)-C(14) 145.6(2)

C(18)-C(15)-C(17) 108.11(15)

C(18)-C(15)-C(16) 108.62(15)

C(17)-C(15)-C(16) 105.24(15)

C(18)-C(15)-C(6) 111.21(14)

C(17)-C(15)-C(6) 116.06(13)

C(16)-C(15)-C(6) 107.22(14)

O(1)-Li(1)-O(2) 108.58(15)

O(1)-Li(1)-B(1)#1 111.83(14)

O(2)-Li(1)-B(1)#1 118.10(14)

O(1)-Li(1)-B(1) 111.77(14)

O(2)-Li(1)-B(1) 113.61(14)

B(1)#1-Li(1)-B(1) 92.22(11)

C(19)-O(1)-C(22) 108.87(14)

C(19)-O(1)-Li(1) 122.33(14)

C(22)-O(1)-Li(1) 128.10(13)

O(1)-C(19)-C(20) 104.78(17)

C(21)-C(20)-C(19) 102.02(17)

C(22)-C(21)-C(20) 102.36(17)

O(1)-C(22)-C(21) 106.80(15)

C(23)-O(2)-C(26) 109.01(15)

C(23)-O(2)-Li(1) 130.23(16)

C(26)-O(2)-Li(1) 120.44(15)

O(2)-C(23)-C(24) 106.3(2)

C(25)-C(24)-C(23) 103.35(19)

C(24)-C(25)-C(26) 102.48(18)

O(2)-C(26)-C(25) 105.67(19)

C(28)-C(27)-C(32) 117.0(2)

C(28)-C(27)-C(33) 121.9(2)

C(32)-C(27)-C(33) 121.1(2)

C(29)-C(28)-C(27) 121.6(2)

C(30)-C(29)-C(28) 120.2(2)

C(29)-C(30)-C(31) 119.4(3)

C(30)-C(31)-C(32) 120.7(3)

C(31)-C(32)-C(27) 121.1(2)

_____________________________________________________________

Symmetry transformations used to generate equivalent atoms:

#1 -x+1,-y+1,-z+1

Table 4. Anisotropic displacement parameters (Å2x 103) for 2. The anisotropic

displacement factor exponent takes the form: -22[ h2 a*2U11 + ... + 2 h k a* b* U12 ]

______________________________________________________________________________

U11 U22 U33 U23 U13 U12

______________________________________________________________________________

B(1) 38(1) 26(1) 22(1) -3(1) 9(1) 6(1)

B(2) 38(1) 37(1) 34(1) 0(1) 11(1) -8(1)

B(3) 48(1) 31(1) 37(1) 7(1) 16(1) 7(1)

P(1) 29(1) 23(1) 20(1) 0(1) 9(1) 3(1)

C(1) 26(1) 21(1) 21(1) -2(1) 8(1) 2(1)

C(2) 27(1) 26(1) 23(1) 2(1) 6(1) 4(1)

C(3) 24(1) 35(1) 28(1) 1(1) 11(1) 6(1)

C(5) 30(1) 33(1) 20(1) 0(1) 5(1) 4(1)

C(6) 25(1) 25(1) 22(1) 0(1) 6(1) 3(1)

C(7) 26(1) 40(1) 28(1) 1(1) 4(1) 6(1)

C(8) 33(1) 60(1) 29(1) -7(1) -1(1) 4(1)

C(9) 40(1) 54(1) 44(1) 7(1) -2(1) 16(1)

C(10) 30(1) 64(1) 41(1) 1(1) 4(1) -7(1)

C(4) 32(1) 31(1) 23(1) -1(1) 11(1) 3(1)

C(11) 41(1) 43(1) 25(1) -3(1) 14(1) 9(1)

C(12) 45(2) 56(3) 38(2) -5(2) 21(2) 16(2)

C(13) 86(4) 47(2) 34(2) 6(2) 32(2) 18(2)

C(14) 53(2) 54(3) 45(2) -21(2) 15(2) 2(2)

C(12') 80(4) 42(2) 46(2) -3(2) 31(2) 14(2)

C(13') 51(2) 57(2) 34(2) 2(2) 24(2) -3(2)

C(14') 50(2) 77(3) 25(2) -10(2) 14(2) 3(2)

C(15) 29(1) 39(1) 24(1) 0(1) 4(1) 11(1)

C(16) 49(1) 48(1) 37(1) 9(1) 3(1) 19(1)

C(17) 41(1) 52(1) 32(1) -4(1) 5(1) 26(1)

C(18) 28(1) 61(1) 37(1) -3(1) 3(1) 6(1)

Li(1) 32(1) 35(2) 34(1) 6(1) 5(1) 3(1)

O(1) 29(1) 31(1) 46(1) 4(1) 4(1) 4(1)

C(19) 32(1) 41(1) 91(2) -5(1) -2(1) 10(1)

C(20) 31(1) 84(2) 54(1) 9(1) 6(1) -2(1)

C(21) 47(1) 46(1) 61(1) 17(1) -8(1) -8(1)

C(22) 39(1) 32(1) 42(1) 7(1) 9(1) 2(1)

O(2) 32(1) 41(1) 42(1) 8(1) -1(1) 4(1)

C(23) 47(1) 74(2) 91(2) 46(2) -2(1) 5(1)

C(24) 53(1) 74(2) 62(1) 17(1) -5(1) 21(1)

C(25) 46(1) 71(2) 56(1) -16(1) -11(1) 17(1)

C(26) 35(1) 52(1) 61(1) 2(1) 0(1) 1(1)

C(27) 58(1) 50(1) 33(1) 3(1) -13(1) -6(1)

C(28) 78(2) 59(1) 38(1) 13(1) 2(1) -14(1)

C(29) 104(2) 41(1) 50(1) 3(1) 1(1) -12(1)

C(30) 108(2) 57(1) 45(1) -3(1) 13(1) -1(1)

C(31) 85(2) 67(2) 57(2) 14(1) 18(1) -6(1)

C(32) 64(1) 43(1) 59(1) 12(1) -7(1) -13(1)

C(33) 80(2) 75(2) 50(1) 1(1) -8(1) 18(1)

______________________________________________________________________________

Table 5. Hydrogen coordinates ( x 104) and isotropic displacement parameters (Å2x 10 3)

for 2.

________________________________________________________________________________

x y z U(eq)

________________________________________________________________________________

H(1BA) 5690(20) 5020(20) 3782(13) 50(6)

H(1BB) 6160(20) 4048(17) 4570(12) 34(5)

H(1BC) 4330(20) 4195(18) 4205(13) 44(6)

H(2BA) 3660(20) 1120(20) 2406(14) 53(6)

H(2BB) 3110(20) 1860(20) 3419(14) 55(6)

H(32B) 4610(20) 780(20) 3443(14) 59(7)

H(3BA) 6440(20) 680(20) 3274(14) 55(6)

H(3BB) 6000(20) 1391(18) 4307(13) 41(5)

H(3) 8727 1861 1380 34

H(5) 4996 2574 255 33

H(8A) 8025 4054 3628 63

H(8B) 9413 3546 4072 63

H(8C) 7984 2796 3990 63

H(9A) 8670 948 3208 70

H(9B) 10184 1565 3450 70

H(9C) 9608 1068 2511 70

H(10A) 10128 3084 2097 69

H(10B) 10717 3538 3042 69

H(10C) 9549 4259 2547 69

H(12A) 8687 405 -601 69

H(12B) 8537 231 328 69

H(12C) 9365 1386 142 69

H(13A) 7955 3024 -505 79

H(13B) 6334 2761 -786 79

H(13C) 7403 2012 -1256 79

H(14A) 5173 850 -604 78

H(14B) 6047 -121 -139 78

H(14C) 6264 95 -1051 78

H(12D) 8054 -16 -609 82

H(12E) 7065 -233 48 82

H(12F) 8585 349 354 82

H(13D) 8718 2061 -874 69

H(13E) 9277 2352 92 69

H(13F) 8158 3177 -347 69

H(14D) 5863 2367 -908 77

H(14E) 5301 1065 -779 77

H(14F) 6422 1195 -1373 77

H(16A) 4011 4133 253 66

H(16B) 4728 5091 998 66

H(16C) 3088 5008 752 66

H(17A) 2664 4798 2045 63

H(17B) 4256 4874 2446 63

H(17C) 3277 3775 2575 63

H(18A) 2513 2152 1443 64

H(18B) 2808 2277 531 64

H(18C) 1775 3152 939 64

H(19A) 8005 6271 4376 68

H(19B) 8145 6837 5327 68

H(20A) 9745 8027 4889 68

H(20B) 8843 8009 3986 68

H(21A) 8293 9302 5497 63

H(21B) 8281 9823 4627 63

H(22A) 6014 9059 5045 44

H(22B) 6212 8946 4092 44

H(23A) 3831 8081 3068 83

H(23B) 3596 8775 3939 83

H(24A) 1287 8675 3582 76

H(24B) 1641 8546 2657 76

H(25A) 1373 6511 2505 74

H(25B) 218 6864 3075 74

H(26A) 1607 6520 4246 61

H(26B) 2111 5509 3599 61

H(28) 8914 7913 972 70

H(29) 7704 9300 1695 80

H(30) 6278 8678 2572 85

H(31) 6103 6662 2743 82

H(32) 7272 5260 2007 68

H(33A) 9051 5761 395 106

H(33B) 8533 4737 887 106

H(33C) 9940 5494 1244 106

________________________________________________________________________________
